# Supplementary material for: MYLK*FLNB and DOCK1*LAMA2 gene–gene interactions associated with rheumatoid arthritis in the focal adhesion pathway
Source: PubMed Central journal article supplement (PMC11128622; doi:10.3389/fgene.2024.1375036), 2024-05-13
Supplement: DataSheet1.pdf [file DataSheet1.pdf]

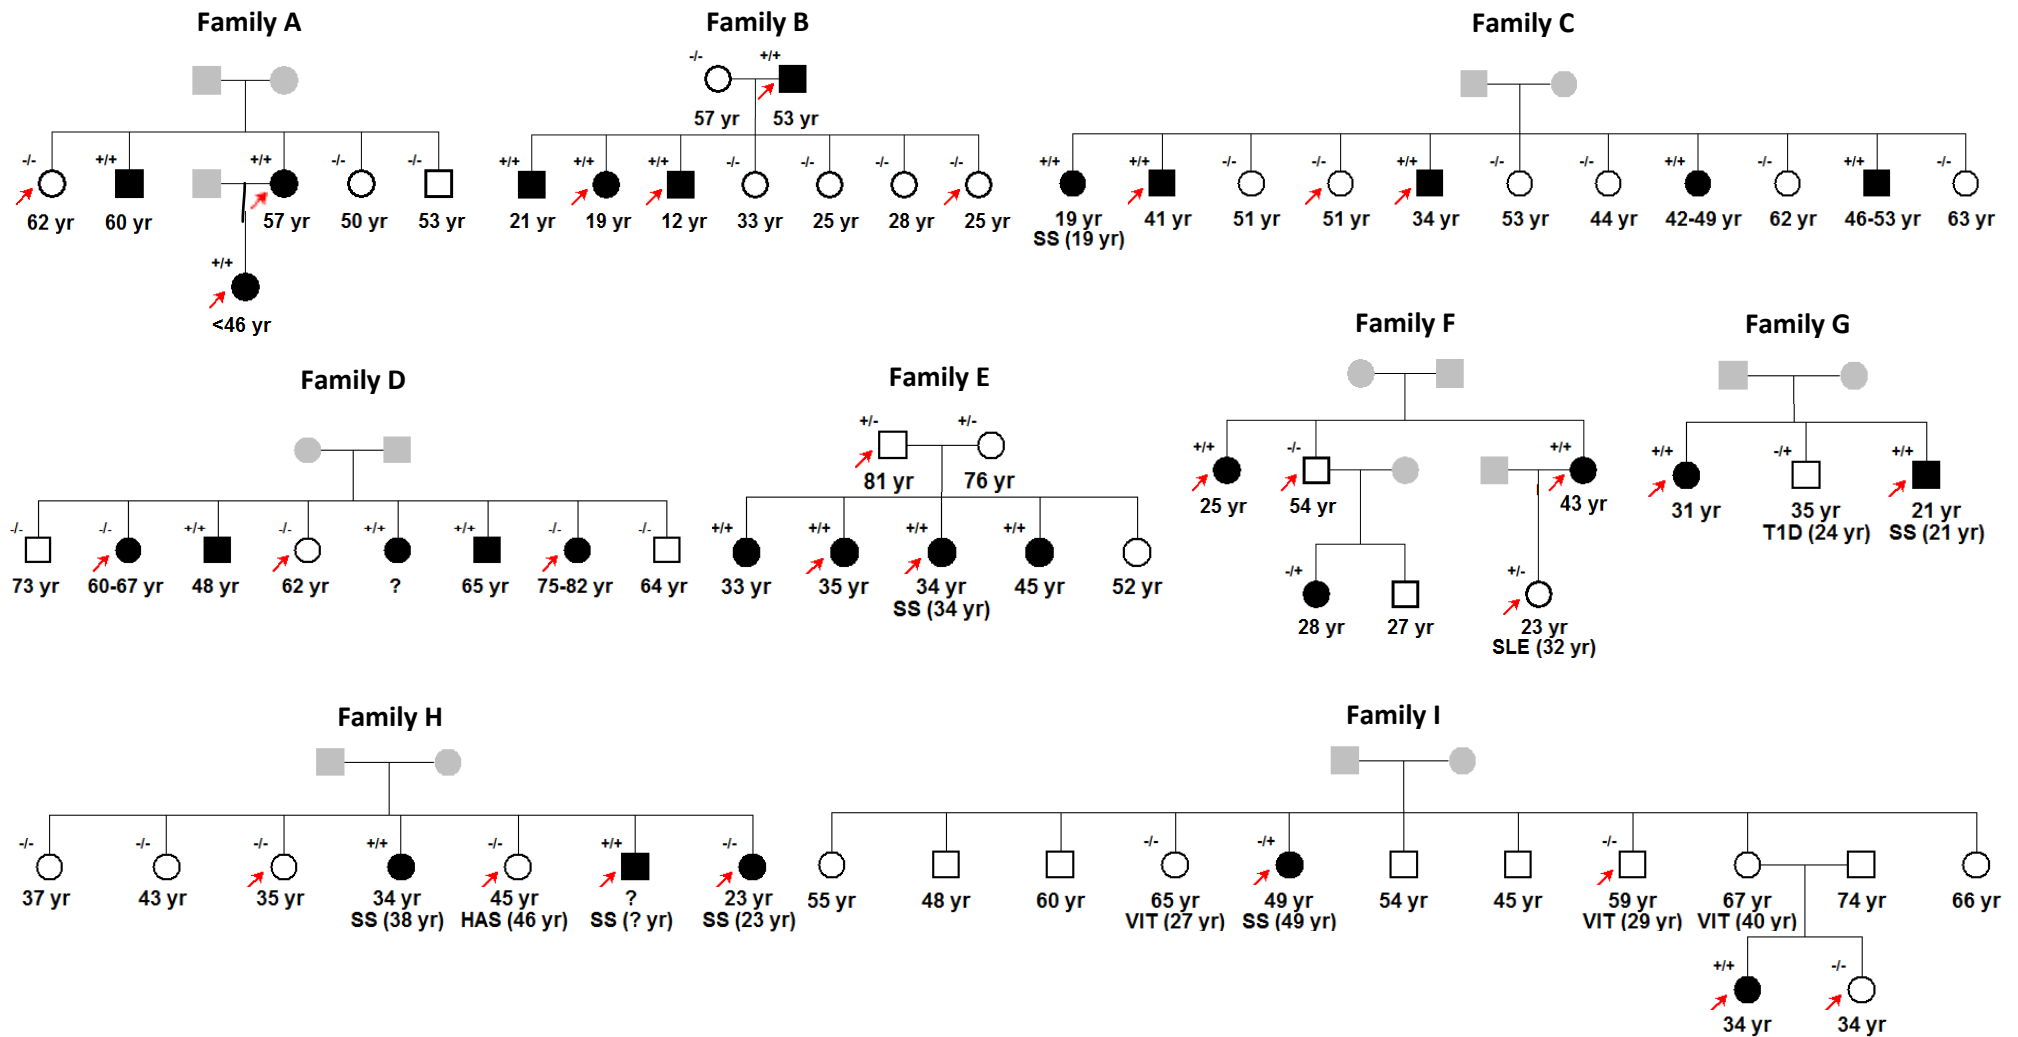

**Figure S1. Pedigree charts of the 9 French families with multiple cases of autoimmune diseases included in the study.**

Red arrows indicate family members sequenced by WES. Squares and circles denote males and females respectively. Color in symbols indicates the RA status: black for RA cases; blank for unaffected; and grey for unknown RA status. Text beside symbols indicates the ACPA and Rheumatoid factor (RF) status when it is known (+/+ = positive for ACPA and RF; +/- = positive for ACPA and negative for RF; -/+ = negative for ACPA and positive for RF; -/- = negative for ACPA and RF). First line below symbol indicates the age at exam for unaffected and age at diagnosis for RA cases if known (? : unknown and a-b : age at diagnostic between a and b). Second line indicates other autoimmune disease (and age at diagnosis): SS = Sjögren's Syndrome; SLE = Systemic Lupus Erythematosus; T1D = TYPE 1 DIABETE; HAS = HASHIMOTO; VIT = Vitiligo.
